# Supplementary material for: Identification and Characterization of Oncogenic SOS1 Mutations in Lung Adenocarcinoma
Source: Oxford University Press journal article supplement (doi:10.1158/1541-7786.mcr-18-0316), 2019-01-11
Supplement: 15417786mcr180316-sup-199440_4_supp_5209051_pjcp77.xlsx [file 15417786mcr180316-sup-199440_4_supp_5209051_pjcp77.xlsx]

## Sheet: Table_S1 mutagenesis primers
amino acid mutation	nucleotide mutation	primer 1	primer 2
N233Y	a697t	ttttagagagccctttgtctcctattcaaaattgttttcagctaat	attagctgaaaacaattttgaataggagacaaagggctctctaaaa
D265N	g793a	ttcatctgtcatttctactgtattttctatatggcccagtaacttta	taaagttactgggccatatagaaaatacagtagaaatgacagatgaa
I327T	t980c	gcagcactttatttgcagtcaacaggcgaaggtttc	gaaaccttcgcctgttgactgcaaataaagtgctgc
P478L	c1433t	atcaaatcatgggcagctaagacttcctggtgcta	tagcaccaggaagtcttagctgcccatgatttgat
N535S	a1604g	aagtcagctgaagagaaaagcaattggatggcagcattg	caatgctgccatccaattgcttttctcttcagctgactt
G604V	g1811t	ctggaattccaattatcaaagcagtaactgttattaaacttatagagag	ctctctataagtttaataacagttactgctttgataattggaattccag
I733V	a2197g	gcaatgaaaaaatgggttgaatccgtcactaaaataatccaaaggaaaa	ttttcctttggattattttagtgacggattcaacccattttttcattgc
L938F	g2814c	gaatttatctcactaatatcttcaaaacagaagaaggcaaccctg	cagggttgccttcttctgttttgaagatattagtgagataaattc
R1051G	a3151g	gaccaggtaccatggggcatcccacacct	aggtgtgggatgccccatggtacctggtc
H349Q	c1047g	ttctggcccctgtttaccagtgtctccattacttt	aaagtaatggagacactggtaaacaggggccagaa
351-LHYFELL-357 to 351-IIIRDII-357	c1051a_c1054a_a1055t_t1057a_a1058t_t1060c_t1061g_a1065t_c1066a_t1069a_g1071a	ccttgtcttcttgatcttcacttttttcttctaactgctttataatatcacggataatgatacagtggtaaacaggggccagaagcagcctgggtaaaaca	tgttttacccaggctgcttctggcccctgtttaccactgtatcattatccgtgatattataaagcagttagaagaaaaaagtgaagatcaagaagacaagg
W729E	t2185g_g2186a	tagtgatggattcaacctcttttttcattgctttacctcttactgttccaat	attggaacagtaagaggtaaagcaatgaaaaaagaggttgaatccatcacta
F929A	t2785g_t2786c	gtctattaatccaccatgtgtgcctgcctttggaatttatctcactaatatc	gatattagtgagataaattccaaaggcaggcacacatggtggattaatagac

## Sheet: Table_S2 shRNA sequences
shRNA	target sequence
shSOS1-1	CCCACAGTTGAGTGGCATATA
shSOS1-4	AGCCTATTCACCACGATATTC
shSOS1-6	CCACCAGGTTTCTGTTTACAT

## Sheet: Table_S3 GSEA enrichment
Significantly enriched gene sets for SOS1 N233Y vs. SOS1 WT from gene set enrichment analysis
Gene Set	FDR q-value	FWER p-value
Hallmark MYC Targets V1	0.018	0.016
Chiaradonna neoplastic transformation Kras Cdc25 Up	0	0
Chiaradonna neoplastic transformation Kras Up	0	0
KEGG Ribosome	0.004	0.011
Reactome peptide chain elogation	0.006	0.022
